# Supplementary material for: KRN4 Controls Quantitative Variation in Maize Kernel Row Number
Source: PubMed Central journal article supplement (PMC4648495; doi:10.1371/journal.pgen.1005670), 2015-11-17

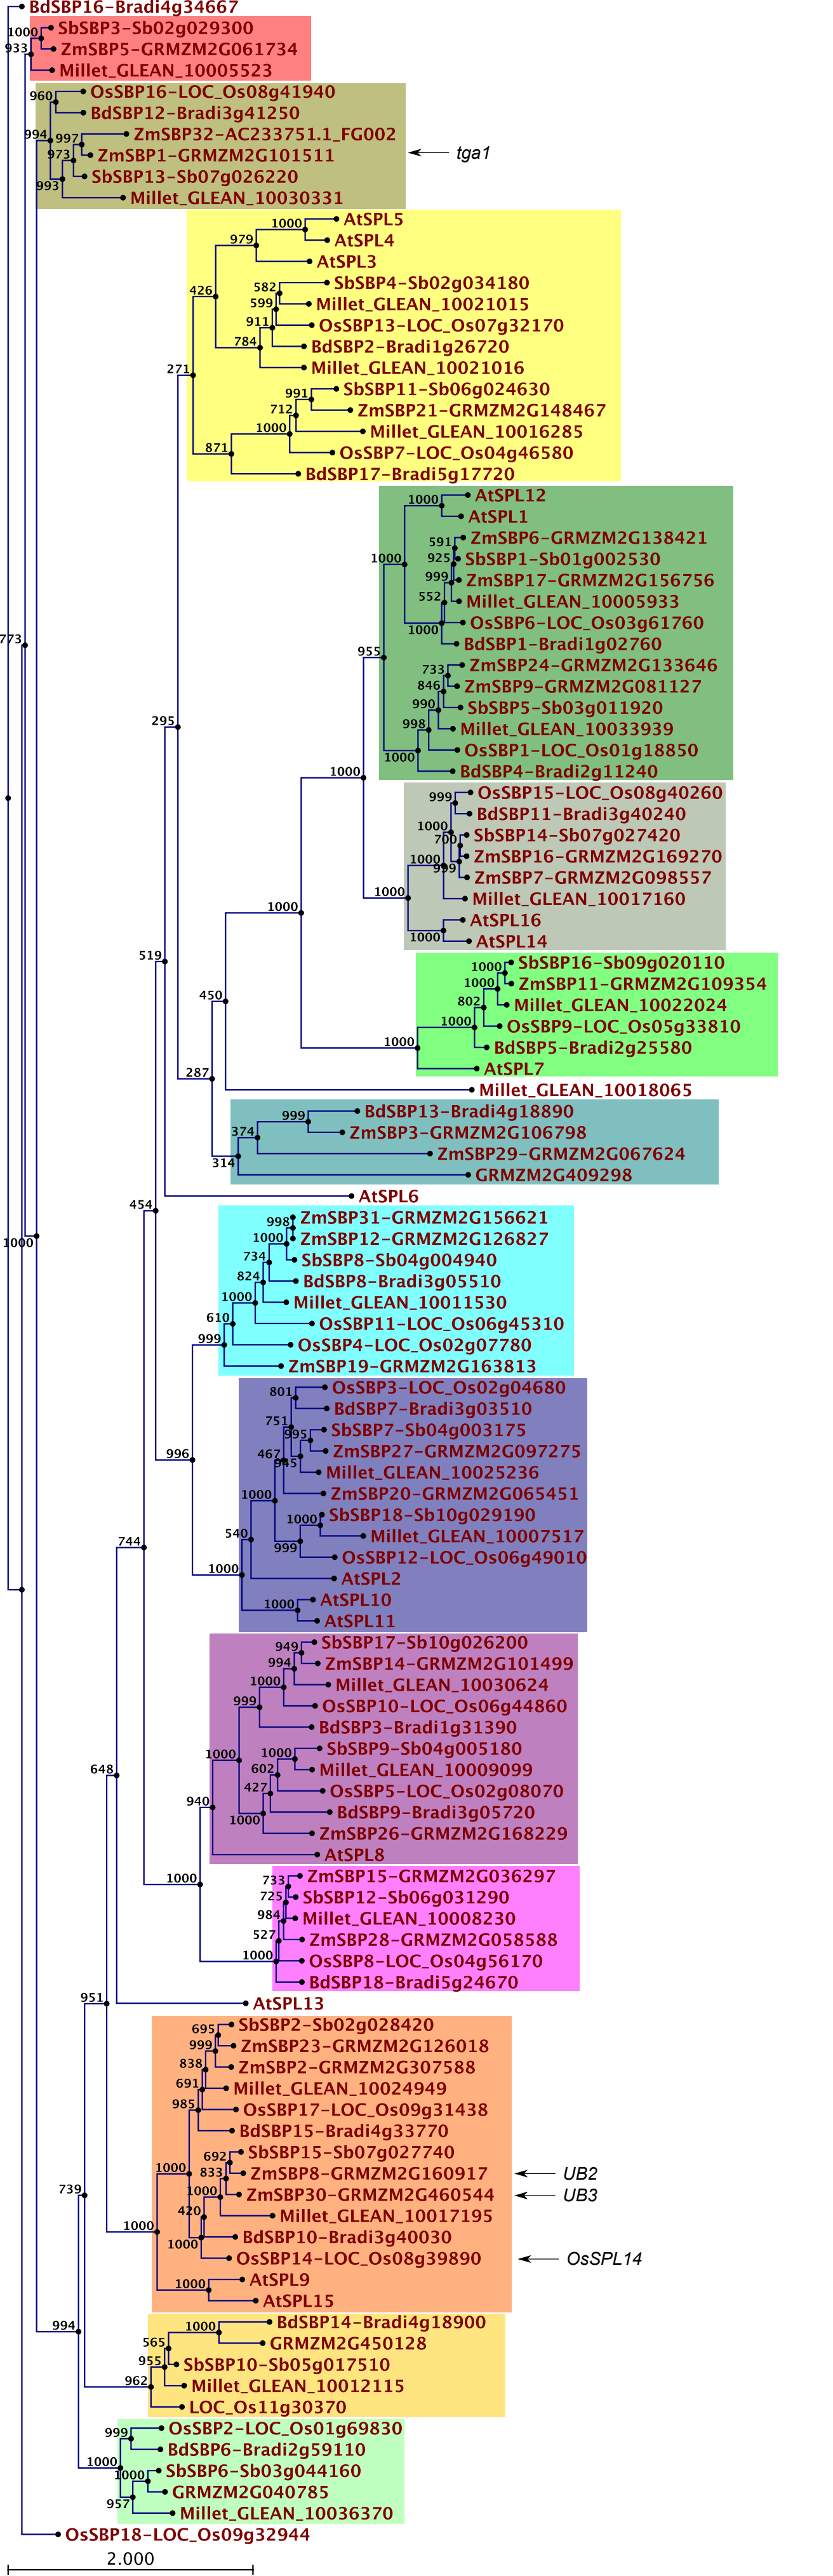

Supplement: pgen.1005670.s005.pdf [file pgen.1005670.s005.pdf]
